# Supplementary material for: Micro-solvation of CO in water: infrared spectra and structural calculations for (D2O)2–CO and (D2O)3–CO
Source: Royal Society of Chemistry journal article supplement (doi:10.1039/c9cp05480d), 2019-01-01
Supplement: c9cp05480d1.pdf [file c9cp05480d1.pdf]

## SUPPLEMENTARY MATERIAL

### Micro-solvation of CO in water: Infrared spectra and structural calculations for $(D_2O)_2$ -CO and $(D_2O)_3$ -CO

A.J. Barclay,<sup>a</sup> A. Pietropolli Charmet,<sup>b</sup> K.H. Michaelian,<sup>c</sup> A.R.W. McKellar,<sup>d</sup> and N. Moazzen-Ahmadi<sup>a,\*</sup>

#### COMPUTATIONAL METHODOLOGY

To locate the stable structures of both  $(D_2O)_2$ -CO and  $(D_2O)_3$ -CO molecular clusters we followed this procedure. First, for each of these two kinds of molecular clusters, 100 different starting geometries were generated by randomly distributing the corresponding monomers (i.e. the  $D_2O$  and CO molecules) upon the surface of a sphere having the radius of a few Angstroms. Then, on each of these geometries a full optimization was performed, i.e. the geometries of each monomers in the molecular cluster were allowed to relax. On each of the optimized structures thus obtained, the calculation of the Hessian was carried out to confirm that the corresponding geometry corresponds to a true minimum on the PES. Each one of these steps was performed at B2PLYP-D3BJ level of theory in conjunction with the m-aug-cc-pVTZ basis set.<sup>1</sup>

For computing the CBS limit of the binding energies, two different extrapolation schemes were used, both composed of several single point energy calculations carried out on the optimized geometries obtained at B2PLYP-D3BJ level of theory in conjunction with the m-aug-cc-pVTZ basis set. For the composite schemes, the aug-cc-pVNZ basis sets with  $N= T, Q$  and 5 were employed.<sup>2,3</sup> Additional calculations were carried out using the cc-pCVTZ basis set.<sup>4</sup>

The first composite scheme, labelled as CBS-1, is based on separate extrapolation of the CBS limit for the Hartree-Fock (HF-SCF) energy,  $E_{CBS}(\text{HF-SCF})$  and for the correlation energy computed at MP2 level of theory,  $E_{CBS}(\text{corr})$ . For  $E_{CBS}(\text{HF-SCF})$  the expression proposed by Fenner<sup>5</sup> was used, while for  $E_{CBS}(\text{corr})$  the following inverse cubic function was used:

$$E_{CBS}(corr) = \frac{N^3 E_N^{corr} - (N-1)^3 E_{N-1}^{corr}}{N^3 - (N-1)^3}.$$

The CBS limit was expressed as:

$$E_{CBS} = E_{CBS}(HF - SCF) + E_{CBS}(corr)$$

The effects due to higher-order electron correlation past the MP2 level of theory was taken into account as the difference between the CCSD(T) and MP2 single point energies, computed using the aug-cc-pVTZ basis set.

$$\Delta_{MP2}^{CCSD(T)} = E_{CCSD(T)} - E_{MP2}$$

For computing the core-valence (CV) corrections, two calculations were performed at MP2 level and using the cc-pCVTZ basis set, correlating all the electrons,  $E_{ae-MP2}$ , and within the frozen-core approximation,  $E_{fc-MP2}$ .

$$\delta_{MP2}^{CV} = E_{ae-MP2} - E_{fc-MP2}$$

The CBS-1 limit was therefore given as

$$E_{CBS-1} = E_{CBS}(HF - SCF) + E_{CBS}(corr) + \Delta_{MP2}^{CCSD(T)} + \delta_{MP2}^{CV}$$

The second composite scheme, labelled as CBS-2, is based on using the 4-5 inverse polynomial extrapolation for the CBS energy at MP2 level,<sup>6,7</sup> according to the following expression:

$$E_{CBS} = E_N(MP2) + \frac{b}{(N+1)^4} + \frac{c}{(N+1)^5}$$

The corrections due to higher-order electron correlation past the MP2 level of theory, and those due to CV effects, are computed as in CBS-1.

On the basis of these two extrapolation schemes (and taking into account the inclusion of zero-point vibrational correction), the most stable isomers of  $(\text{D}_2\text{O})_2\text{-CO}$  and  $(\text{D}_2\text{O})_3\text{-CO}$  among the different structures optimized were therefore identified. These two isomers were further optimized at CCSD(T)-F12c level of theory employing the VTZ-F12 and VDZ-F12 basis sets for  $(\text{D}_2\text{O})_2\text{-CO}$  and  $(\text{D}_2\text{O})_3\text{-CO}$ , respectively. Anharmonic corrections were computed (within the framework of VPT2 theory and employing a reduced dimensionality scheme) using the m-aug-cc-pVTZ basis set and the B2PLYP-D3BJ and B3LYP-D3BJ functionals for  $(\text{D}_2\text{O})_2\text{-CO}$  and  $(\text{D}_2\text{O})_3\text{-CO}$ , respectively.

All the DFT-D3BJ calculations were performed using the ORCA suite of programs,<sup>8</sup> while MOLPRO was used for CCSD(T\*)-F12c computations;<sup>9,10</sup> single point energy calculations were carried out using the Gaussian suite of quantum chemical programs.<sup>11</sup> Geometry optimizations were carried out using the *TightOpt* criteria as implemented in the Orca software.

## REFERENCES

- (1) Papajak, E.; Leverentz, H.R.; Zheng, J.; Truhlar, D.G. Efficient Diffuse Basis Sets: cc-pVxZ+ and maug-cc-pVxZ *J. Chem. Theor. Comput.* **2009**, *5*, 1197.
- (2) Dunning, T. Gaussian-Basis Sets for Use in Correlated Molecular Calculations 0.1. The Atoms Boron through Neon and Hydrogen. *J. Chem. Phys.* 1989, *90*, 1007–1023.
- (3) Kendall, R.; Dunning, T.; Harrison, R. Electron Affinities of the First-Row Atoms Revisited. Systematic Basis Sets and Wave Functions. *J. Chem. Phys.* 1992, *96*, 6796–6806.
- (4) K.A. Peterson, T.H. Jr Dunning, Accurate correlation consistent basis sets for molecular core–valence correlation effects: The second row atoms Al–Ar, and the first row atoms B–Ne revisited. *J. Chem. Phys.* 117 (2002) 10548.
- (5) Feller, D. The use of systematic sequences of wave functions for estimating the complete basis set, full configuration interaction limit in water. *J. Chem. Phys.* **1993**, *98*, 7059–7071.

- (6) Klopper, W. Limiting Values for Møller-Plesset 2nd-Order Correlation Energies of Polyatomic Systems, A Benchmark Study on Ne, HF, H<sub>2</sub>O, N<sub>2</sub>, and He···He. *J. Chem. Phys.* **1995**, 102, 6168–6179.
- (7) Xantheas, S. S. Significance of Higher-Order Many-Body Interaction Energy Terms in Water Clusters and Bulk Water. *Philos. Mag. B* **1996**, 73, 107–115.
- (8) Neese, F.; "Software update: the ORCA program system, version 4.0" *WIREs Comput Mol Sci* 2017, e1327. doi: 10.1002/wcms.1327
- (9) H.-J. Werner, P. J. Knowles, G. Knizia, F. R. Manby and M. Schütz, *WIREs Comput Mol Sci* 2 (2012) 242.
- (10) MOLPRO, version 2015.1, a package of ab initio programs, H.-J. Werner, P. J. Knowles, G. Knizia, F. R. Manby, M. Schütz, P. Celani, W. Györfy, D. Kats, T. Korona, R. Lindh, A. Mitrushenkov, G. Rauhut, K. R. Shamasundar, T. B. Adler, R. D. Amos, A. Bernhardsson, A. Berning, D. L. Cooper, M. J. O. Deegan, A. J. Dobbyn, F. Eckert, E. Goll, C. Hampel, A. Hesselmann, G. Hetzer, T. Hrenar, G. Jansen, C. Köppl, Y. Liu, A. W. Lloyd, R. A. Mata, A. J. May, S. J. McNicholas, W. Meyer, M. E. Mura, A. Nicklass, D. P. O'Neill, P. Palmieri, D. Peng, K. Pflüger, R. Pitzer, M. Reiher, T. Shiozaki, H. Stoll, A. J. Stone, R. Tarroni, T. Thorsteinsson, and M. Wang, , see <http://www.molpro.net>.
- (11) M.J. Frisch, G.W. Trucks, H.B. Schlegel, G.E. Scuseria, M.A. Robb, J.R. Cheeseman, G. Scalmani, V. Barone, B. Mennucci, G.A. Petersson, H. Nakatsuji, M. Caricato, X. Li, H.P. Hratchian, A.F. Izmaylov, J. Bloino, G. Zheng, J.L. Sonnenberg, M. Hada, M. Ehara, K. Toyota, R. Fukuda, J. Hasegawa, M. Ishida, T. Nakajima, Y. Honda, O. Kitao, H. Nakai, T. Vreven, J.A. Montgomery Jr., J.E. Peralta, F. Ogliaro, M. Bearpark, J.J. Heyd, E. Brothers, K.N. Kudin, V.N. Staroverov, T. Keith, R. Kobayashi, J. Normand, K. Raghavachari, A. Rendell, J.C. Burant, S.S. Iyengar, J. Tomasi, M. Cossi, N. Rega, J.M. Millam, M. Klene, J.E. Knox, J.B. Cross, V. Bakken, C. Adamo, J. Jaramillo, R. Gomperts, R.E. Stratmann, O. Yazyev, A.J. Austin, R. Cammi, C. Pomelli, J.W. Ochterski, R.L. Martin, K. Morokuma, V.G.

Zakrzewski, G.A. Voth, P. Salvador, J.J. Dannenberg, S. Dapprich, A.D. Daniels, O. Farkas, J.B. Foresman, J.V. Ortiz, J. Cioslowski, D.J. Fox, Gaussian 16, Revision B.01, Gaussian, Inc., Wallingford CT, 2016.

\*\*\*\*\*  
Optimized geometries (Angstrom) for (D<sub>2</sub>O)<sub>2</sub>-CO at B2PLYP-D3BJ/m-aug-cc-pVTZ level of theory

Geo #1

|   |           |           |           |
|---|-----------|-----------|-----------|
| O | 1.622847  | -1.147135 | -0.100131 |
| D | 0.717759  | -1.469857 | -0.053644 |
| D | 2.080711  | -1.575062 | 0.627735  |
| O | 0.815533  | 1.620769  | 0.080635  |
| D | 1.352517  | 2.247904  | -0.407638 |
| D | 1.265664  | 0.769125  | -0.015727 |
| C | -2.148802 | 0.263367  | -0.021961 |
| O | -1.503859 | -0.667673 | 0.017127  |

Geo #2

|   |           |           |           |
|---|-----------|-----------|-----------|
| O | 3.184234  | -0.652575 | 0.000170  |
| D | 3.712497  | -0.401283 | 0.762621  |
| D | 3.712542  | -0.401217 | -0.762229 |
| O | 0.824212  | 1.093692  | 0.000100  |
| D | 0.002354  | 0.596186  | 0.000048  |
| D | 1.524999  | 0.428229  | 0.000132  |
| C | -2.293791 | -0.156094 | -0.000137 |
| O | -3.407151 | -0.351786 | -0.000239 |

Geo #3

|   |           |           |           |
|---|-----------|-----------|-----------|
| O | -1.753910 | -1.139366 | -0.102068 |
| D | -0.810431 | -1.322000 | -0.015634 |
| D | -2.175881 | -1.626294 | 0.609776  |
| O | -0.893528 | 1.585447  | 0.083084  |
| D | -1.423694 | 0.779900  | -0.005631 |
| D | -1.358134 | 2.253610  | -0.424746 |
| C | 1.373468  | -0.596175 | 0.014192  |
| O | 2.338354  | -0.009602 | -0.012131 |

\*\*\*\*\*  
Optimized geometries (Angstrom) for (D<sub>2</sub>O)<sub>3</sub>-CO at B2PLYP-D3BJ/m-aug-cc-pVTZ level of theory

Geo #1

|   |           |           |           |
|---|-----------|-----------|-----------|
| C | -1.887305 | 0.548357  | -0.055951 |
| O | -2.853309 | -0.031168 | -0.137439 |
| O | 0.982512  | 1.831276  | 0.069691  |
| D | 1.047221  | 2.396277  | 0.843355  |
| D | 0.079574  | 1.482672  | 0.077903  |
| O | 2.474441  | -0.506361 | -0.120431 |
| D | 2.951774  | -0.532175 | -0.952564 |
| D | 2.085733  | 0.386276  | -0.067218 |
| O | -0.052213 | -1.689620 | 0.153355  |
| D | -0.033812 | -2.533708 | 0.608793  |
| D | 0.881101  | -1.428821 | 0.057338  |

Geo #2

|   |           |           |           |
|---|-----------|-----------|-----------|
| C | 1.953123  | 0.547254  | -0.137574 |
| O | 2.621973  | -0.306533 | 0.180859  |
| O | -0.756893 | -1.259900 | -1.089140 |
| D | -1.002931 | -1.288242 | -0.148381 |
| D | -1.189451 | -2.008326 | -1.504978 |
| O | -1.291944 | -0.310001 | 1.460115  |
| D | -2.016230 | -0.283953 | 2.088494  |
| D | -1.353749 | 0.509803  | 0.934175  |
| O | -1.146186 | 1.493853  | -0.642888 |
| D | -0.254439 | 1.853496  | -0.661620 |
| D | -1.070968 | 0.656083  | -1.129436 |

Geo #3

|   |           |           |           |
|---|-----------|-----------|-----------|
| C | -2.972141 | -0.410827 | -2.012870 |
| O | -3.453384 | -0.109090 | -2.989400 |
| O | 1.170521  | -1.624118 | 0.887910  |
| D | 1.724245  | -2.264098 | 1.339644  |
| D | 1.112993  | -0.852925 | 1.478764  |
| O | 0.083108  | 0.574168  | 2.225853  |

|   |           |           |          |
|---|-----------|-----------|----------|
| D | -0.126512 | 0.762689  | 3.142786 |
| D | -0.714172 | 0.157753  | 1.847437 |
| O | -1.595442 | -1.157729 | 0.872419 |
| D | -1.983832 | -0.980573 | 0.010071 |
| D | -0.745385 | -1.595249 | 0.697386 |

Geo #4

|   |           |           |           |
|---|-----------|-----------|-----------|
| C | -1.685950 | -1.054714 | 0.198649  |
| O | -2.699516 | -1.294242 | -0.237052 |
| O | 3.342534  | -0.724293 | -0.450699 |
| D | 3.555350  | -0.252286 | -1.258308 |
| D | 2.548909  | -0.290845 | -0.107375 |
| O | 0.985713  | 0.404753  | 0.844767  |
| D | 0.257260  | -0.232072 | 0.818997  |
| D | 1.237545  | 0.475868  | 1.769829  |
| O | -1.153660 | 1.921707  | -0.336409 |
| D | -0.271706 | 1.729660  | 0.008984  |
| D | -1.053575 | 2.702538  | -0.884927 |

Geo #5

|   |           |           |           |
|---|-----------|-----------|-----------|
| C | -2.458665 | -0.953527 | -1.443108 |
| O | -3.307817 | -1.660455 | -1.679196 |
| O | 2.086023  | 1.268387  | 0.992525  |
| D | 2.192642  | 0.589519  | 1.661867  |
| D | 1.161037  | 1.208215  | 0.691205  |
| O | 2.474711  | 1.098466  | -1.761577 |
| D | 2.981849  | 1.804127  | -2.168589 |
| D | 2.654115  | 1.159167  | -0.806296 |
| O | -0.116168 | 1.231845  | -0.690349 |
| D | 0.595136  | 1.186922  | -1.351333 |
| D | -0.762862 | 0.567333  | -0.945150 |

Geo #6

|   |           |           |           |
|---|-----------|-----------|-----------|
| C | 0.978824  | -2.036319 | 0.429083  |
| O | 1.993007  | -2.507696 | 0.593977  |
| O | -0.992593 | 0.644713  | 0.736542  |
| D | -0.249102 | 0.575243  | 1.359303  |
| D | -1.065938 | -0.237269 | 0.362312  |
| O | 1.590239  | 0.909214  | 1.825248  |
| D | 1.607869  | 1.598040  | 1.136783  |
| D | 1.918414  | 1.326823  | 2.624575  |
| O | 0.765599  | 2.574956  | -0.231654 |
| D | 0.971327  | 2.654185  | -1.165188 |
| D | -0.017645 | 1.998110  | -0.170982 |

Geo #7

|   |           |          |           |
|---|-----------|----------|-----------|
| C | -2.737332 | 0.430235 | -0.343360 |
|---|-----------|----------|-----------|

|   |           |           |           |
|---|-----------|-----------|-----------|
| O | -3.707299 | 1.001289  | -0.247173 |
| O | -0.019934 | -1.308447 | -0.941313 |
| D | 0.533731  | -1.399860 | -0.148540 |
| D | -0.786340 | -0.790275 | -0.678257 |
| O | 2.378256  | -0.481702 | -2.036943 |
| D | 1.433562  | -0.698636 | -1.926714 |
| D | 2.674257  | -0.979509 | -2.802052 |
| O | 2.332657  | -1.386371 | 0.600244  |
| D | 2.657703  | -1.045119 | -0.252011 |
| D | 2.740739  | -0.841605 | 1.276120  |

Geo #8

|   |           |           |           |
|---|-----------|-----------|-----------|
| C | -0.702320 | -0.054020 | 2.062443  |
| O | -0.411833 | -1.141570 | 2.159385  |
| O | -0.280641 | 0.518891  | -0.832033 |
| D | -0.704813 | 1.367698  | -0.652080 |
| D | -0.432748 | 0.337857  | -1.768591 |
| O | -0.532181 | -0.242916 | -3.650429 |
| D | 0.346473  | -0.440299 | -3.985662 |
| D | -1.038817 | -1.048566 | -3.782531 |
| O | -1.469372 | 2.688763  | 0.666560  |
| D | -0.995997 | 3.480190  | 0.933677  |
| D | -1.277752 | 2.033972  | 1.349261  |
